# Supplementary material for: [Patient safety in the treatment of rheumatic diseases : Laboratory monitoring in methotrexate treatment].
Source: Springer Nature journal article supplement (doi:10.1007/s00393-021-00976-7), 2021-06-01
Supplement: MOESM1 [file 18955246]

**Anhang 1. GOP-Ziffern und deren Bedeutung**

| <b>Name</b> | <b>Ziffer</b> | <b>Bedeutung</b>                                                                                                                                                                   |
|-------------|---------------|------------------------------------------------------------------------------------------------------------------------------------------------------------------------------------|
| Rheuma      | 04550         | Zusatzpauschale                                                                                                                                                                    |
| Rheuma      | 04551         | Zusatzpauschale spezielle Funktionsdiagnostik in der pädiatrischen Rheumatologie                                                                                                   |
| Rheuma      | 13690         | Rheumatologische Grundpauschale bis zum vollendeten 5. Lebensjahr                                                                                                                  |
| Rheuma      | 13691         | Rheumatologische Grundpauschale zwischen dem 6.- 59. Lebensjahr                                                                                                                    |
| Rheuma      | 13692         | Rheumatologische Grundpauschale ab dem 60. Lebensjahr                                                                                                                              |
| Rheuma      | 13700         | Zusatzpauschale internistische Rheumatologie                                                                                                                                       |
| Rheuma      | 13701         | Zusatzpauschale rheumatologische Funktionsdiagnostik                                                                                                                               |
| Rheuma      | 18320         | Zusatzpauschale orthopädische oder orthopädisch-rheumatologische Funktionsdiagnostik bzw. Assessment mittels Untersuchungsinventaren                                               |
| Rheuma      | 18700         | Zusatzpauschale Behandlung von rheumatoider Arthritis, seronegativer Spondylarthritis, Kollagenose, Myositis                                                                       |
| Rheuma      | 32023         | Rheumatoide Arthritis einschl. Sonderformen und Kollagenosen unter immunsuppressiver oder immunmodulierender Langzeit-Basistherapie                                                |
| eGFR        | 32066         | Kreatinin (Jaffé-Methode)                                                                                                                                                          |
| eGFR        | 32067         | Kreatinin, enzymatisch                                                                                                                                                             |
| eGFR        | 17340         | Zusatzpauschale Nierenfunktionsdiagnostik                                                                                                                                          |
| eGFR        | 32124         | Endogene Kreatinin-clearance                                                                                                                                                       |
| eGFR        | 32236         | Kreatin                                                                                                                                                                            |
| GPT         | 32070         | GPT (Glutamat-Pyruvat-Transaminase)                                                                                                                                                |
| GGT         | 32071         | GGT (Gamma-Glutamyl-Transferase)                                                                                                                                                   |
| BB          | 32120         | Mechanisieretes Blutbild, Retikulozytenzählung und evtl. Erythrozytenzahl, Leukozytenzahl (ggf. einschl. orientierender Differenzierung), Thrombozytenzahl, Hämoglobin, Hämatokrit |
| BB          | 32121         | Mechanisierte Leukozytendifferenzierung                                                                                                                                            |
| BB          | 32122         | Mechanisierter vollständiger Blutstatus                                                                                                                                            |
| UrinStix    | 32030         | Orientierende Untersuchung                                                                                                                                                         |
| UrinStix    | 32135         | Urin-Mikroalbumin                                                                                                                                                                  |
| UrinStix    | 32880         | Harnstreifentest                                                                                                                                                                   |
